# Supplementary material for: Taking dietary habits into account: A computational method for modeling food choices that goes beyond price
Source: PLoS One. 2017 May 25;12(5):e0178348. doi: 10.1371/journal.pone.0178348 (PMC5460917; doi:10.1371/journal.pone.0178348)
Supplement: S5 Text — (NLOGO) [file pone.0178348.s005.nlogo]

;^^^^^^^^^^^^^^^^^^^^^^^^^^^^^^^^^^^^^^^^^^^^^^^^^^^^^^^^^^^^^^^^^^^^^^^^^^^^^^^^^^^^^^^^^^^^^^^^^^^^^^^^^^^^^^^^^^^^^^^^^^^^^^^^^^^^^^^^^^^^^^^^^^^^^^^^^^^^^^^^^^^^^^^^^^^^^^^^^^^^

;This model simulates how adult people (20+) decide about their food based on the price of food. All of values are related to 2001.
;All of the reported results have been recorded using the "behavior space" tool in Netlogo.
;In all lists the order of foods is this: 0-milk 1-meat 2-eggs 3-dry beans 4-grain 5-friuts 6-veggies 7-fat 8-sugar

;^^^^^^^^^^^^^^^^^^^^^^^^^^^^^^^^^^^^^^^^^^^^^^^^^^^^^^^^^^^^^^^^^^^^^^^^^^^^^^^^^^^^^^^^^^^^^^^^^^^^^^^^^^^^^^^^^^^^^^^^^^^^^^^^^^^^^^^^^^^^^^^^^^^^^^^^^^^^^^^^^^^^^^^^^^^^^^^^^^^^
extensions [CSV]
breed [persons person]

persons-own
[
  day-food-expend ;;average dollars of daily expenditure
  day-income  ;;income per day
  inc-quant  ;;income quantile value between 0-5
  gender ;;male or female
  age ;;based on https://www.census.gov/prod/2001pubs/c2kbr01-12.pdf
  daily-EI ;;daily amount of energy intake in calories
  food-share ;;list containing relative share of calorie taking based on the nine sources (milk, meat ...)
  food-score-overal ;;list containing overal scores for each of categories of food, based on: http://www.cnpp.usda.gov/sites/default/files/healthy_eating_index/hei94-96report.PDF
  food-score-detail ;;list containing food scores on daily base. Each day has similar format as food-score-overal
  annual-consumption ;;list containing annual cosumption of each of categories of food in pound
  els-flag ;;falg used for elasticity scenario - indicates agents who were originally among low 40% before change in their income
  hist-flag ;;same as above for history scenario
  cons-bfr ;;list containing total weight of consumed food for each category before changing income
  cons-aftr ;;list containing total weight of consumed food for each category after changing income
  indv-elas ;;list showing income elasticity for individual persons
]

globals
[
  elas-1st-rond ;;used in the scenario for calculating elasticity as 1st round before increase in income
  hist-1st-rond ;;simillar to above for history checking scenario
  food-types  ;;list containing the name of diffrerent food types
  main-foods ;;list used to determine 5 major elements of food
  avg-diet-cum  ;;list used for implementing probabilities for mean diet
  avg-diet-c-cum ;;list used for implementing complement of probabilities for mean diet
  price-per-cal ;; list containing avg price in $ for 100 kcal -- all this are based on Drewnowski's paper from:http://www.ncbi.nlm.nih.gov/pmc/articles/PMC2954450/pdf/ajcn9251181.pdf
  price-per-gram  ;;list containing price for 100 gram food
  price-per-serving ;;list containg price per serving
  energy-density ;;list containing the number of calories per 100 gram food type
  serving-size ;;list for the weight of one serving of each food category in gram
  avg-cal-% ;; list containing average percentage of  calorie from each food category in the diet of people based on: http://www.tandfonline.com/doi/abs/10.1080/07315724.2011.10719986
  avg-cal-c-% ;;list containing the complement of the above percentages, showing the pronbabilites for being chosen
  foods-pr-cum ;;list containing the probabilities for choosing each food category, by considering both mean diet and price elasticity
  foods-pr-c-cum ;;complement of the above list, used for when the decreasing food categories
  min-cal-% ;;list the same as avg-cal-% except for min allowed percentage
  max-cal-%  ;;list the same as avg-cal-% except for max allowed percentage
  max-score ;;list containing the number of serving of each food category to obtain the max score out of 10 for that specific category - obtained from table 2 http://www.cnpp.usda.gov/sites/default/files/healthy_eating_index/hei94-96report.PDF
  food-score-avg ;;list containing average food-scores of the whole population
  food-share-avg-dtl ;;list containing average values of food-shares of agents (percent from each food category in diet) one for each day
  food-share-avg-agr ;;list similar to above, but contains the overal average
  level40 ;;the daily-expenditure value that shows every person with expending less than that is on the low 40%  (1st and 2nd quantiles) of income of the population
;  cons-agr-bfr ;;the total consumption of different food categories accross the whole population
;  elas-incr ;;coefficient that shows how much the income is
  income-elasticity ;;list contaning calculated food elasticity values
  stop-flag ;;flag to deterimine whether the simulation should stop
]


;^^^^^^^^^^^^^^^^^^^^^^^^^^^^^^^^^^^^^^^^^^^^^^^^^^^^^^^^^^^^^^^^^^^^^^^^^^^^^^^^^^^^^^^^^^  setup  ^^^^^^^^^^^^^^^^^^^^^^^^^^^^^^^^^^^^^^^^^^^^^^^^^^^^^^^^^^^^^^^^^^^^^^^^^^^^^^^^^^^^^^^^^^
to setup
  clear-all
  reset-ticks

 set elas-1st-rond false
 set hist-1st-rond false
;  set elas-incr 1
  set  food-types ["milk" "meat" "eggs" "beans" "grains" "fruits" "vegetables" "fats" "sweets"]
  set main-foods ["milk" "meat" "x" "x" "grains" "fruits" "vegetables" "x" "x"]
  set avg-diet-cum [] ;;list used for implementing cumulitive probabilities for mean diet
  set avg-diet-c-cum [] ;;list used for implementing cumulitive complement of probabilities for mean diet
  set food-share-avg-dtl []
  set stop-flag false

  create-persons num-people ;;create persons as many as num-people
  [
    set xcor random-xcor set ycor random-ycor ;;randomly put them somewhere
    set shape "person"
  ]

  ask persons
    [
      set els-flag false
      set hist-flag false
      set annual-consumption [0 0 0 0 0 0 0 0 0] ;;no consumption at the beginning
      set cons-bfr [0 0 0 0 0 0 0 0 0] ;;consume-before
      set cons-aftr [0 0 0 0 0 0 0 0 0] ;;consume-after
      init-daily-expenditure
      ifelse (random 2 > 0) [set gender "female"][set gender "male"] ;;half of population are male and the other female
      ifelse (gender = "female") [set daily-EI (random-normal 1870.8 19.8) * 1000] [set daily-EI (random-normal 2654.5 37.7) * 1000] ;; EI for females and for males in CALORIES (not KCal) --- from: http://ajcn.nutrition.org/content/97/4/848.full
      set age set-age
      set food-score-overal []
      set food-score-detail []
    ]

  set-level40
  set max-score [[[3 2.4 "x" "x" 9 3 4 "x" "x"] [2 2.4 "x" "x" 9 3 4 "x" "x" ] [2 2.2 "x" "x" 7.4 2.5 3.5 "x" "x" ]] [[3 2.8 "x" "x" 11 4 5 "x" "x"][2 2.8 "x" "x" 11 4 5 "x" "x"][2 2.5 "x" "x" 9.1 3.2 4.2 "x" "x"]]] ;;first list for females and second for males. Each of those two lists has three parts for three different age ranges based on original HEI score
  update-food-prices-cal ;;initialize food prices for $ for 100 kcal
  update-food-prices-gr ;;initialize food prices for $ for 100 gram
  update-food-prices-serving ;;initialize
  set-food-consumption-avg
  set-food-probabilities
  set-energy-density
  set-serving-size

  tick ;;tick once in order to start from 1 not 0
  ;  ask persons with [day-food-expend <= level40] [hatch-low-incomes 1]
end
;^^^^^^^^^^^^^^^^^^^^^^^^^^^^^^^^^^^^^^^^^^^^^^^^^^^^^^^^^^^^^^^^^^^^^^^^^^^^^^^^^^^^^^^^^^  go  ^^^^^^^^^^^^^^^^^^^^^^^^^^^^^^^^^^^^^^^^^^^^^^^^^^^^^^^^^^^^^^^^^^^^^^^^^^^^^^^^^^^^^^^^^^
to go
  ifelse (objective = "history" or objective = "history-z-test")
  [
    go-history
    stop
  ]
  [
    go-ppx
    if  (stop-flag = true) [stop]
  ]

  tick ;;next day
end
;^^^^^^^^^^^^^^^^^^^^^^^^^^^^^^^^^^^^^^^^^^^^^^^^^^^^^^^^^^^^^^^^^^^^^^^^^^^^^^^^^^^^^^^^^^  go-history  ^^^^^^^^^^^^^^^^^^^^^^^^^^^^^^^^^^^^^^^^^^^^^^^^^^^^^^^^^^^^^^^^^^^^^^^^^^^^^^^^^^^^^^^^^^
to go-history
  set Decision-process "Price-per-Calorie"
  ask persons with [day-food-expend <= level40]
    [
      set food-share avg-cal-%  ;;initialize the cons-avg-% for each person at each day as equal to the average for the whole population as in naational data
      choose-food
    ]

  set hist-1st-rond true ;;first round is now finished

  ask persons with [day-food-expend <= level40]
    [
      set hist-flag true
      increase-income
      choose-food
    ]

  ifelse (objective = "history")
  [
    update-food-share-avg
    set-food-share-aggregare
  ]
  [;;for z-test
    let o-list []
    ask persons with [hist-flag = true] [set o-list lput food-share o-list]

    file-open "history-ztest.csv"
    file-print csv:to-string o-list
    file-close

  ]
end
;^^^^^^^^^^^^^^^^^^^^^^^^^^^^^^^^^^^^^^^^^^^^^^^^^^^^^^^^^^^^^^^^^^^^^^^^^^^^^^^^^^^^^^^^^^  go-ppx  ^^^^^^^^^^^^^^^^^^^^^^^^^^^^^^^^^^^^^^^^^^^^^^^^^^^^^^^^^^^^^^^^^^^^^^^^^^^^^^^^^^^^^^^^^^
to go-ppx show ticks
   if (ticks > 30 and ticks mod 30 = 1) ;;next month?
    [
      ifelse (objective = "hei")
      [
        set-food-score-aggregate
        show food-score-avg
        set stop-flag true
        stop
      ]
      [
        ifelse (objective = "diet-%")
        [
          set-food-share-aggregare
          show food-share-avg-agr
          set stop-flag true
          stop
        ]
        [  ;;so objective is elasticity
          ifelse (elas-1st-rond = false)
          [ ;;after first 30 days
            ask persons with [day-food-expend <= level40]
            [
              set els-flag true
              increase-income
            ]
            set elas-1st-rond true ;;first round is now finished
          ]
          [ ;;after second 30 days
            set-elasticity
            set stop-flag true
            stop
          ]
        ]
      ]
    ]

    ask persons with [day-food-expend <= level40]
    [
      set food-share avg-cal-%  ;;initialize the cons-avg-% for each person at each day as equal to the average for the whole population as in naational data
      choose-food
    ]

    ifelse (objective = "hei")
    [ask persons with [day-food-expend <= level40] [update-food-score] ]
    [ifelse (objective = "diet-%")
      [update-food-share-avg]
      [save-food-consumption ] ;;if elasticity
    ]


    if ( price-change? and ticks mod 30 = 0) ;;price change monthly if needed
    [
      ifelse (Decision-process = "Price-per-Calorie")
      [update-food-prices-cal]
      [
        ifelse (Decision-process = "Price-per-Gram")
        [
          update-food-prices-gr
        ]
        [update-food-prices-serving]
      ]
    ]

    if (plot-update?)
    [
      if ( ticks mod 365 = 0)
      [update-food-consumption-plot]

      update-plot
    ]
end
;^^^^^^^^^^^^^^^^^^^^^^^^^^^^^^^^^^^^^^^^^^^^^^^^^^^^^^^^^^^^^^^^^^^^^^^^^^^^^^^^^^^^^^^^^^  choose-food  ^^^^^^^^^^^^^^^^^^^^^^^^^^^^^^^^^^^^^^^^^^^^^^^^^^^^^^^^^^^^^^^^^^^^^^^^^^^^^^^^^^^^^^^^^^
to choose-food ;;determine which food agents choose to eat

               ;  set food-cost diet-avg-$ ;;initial value of food cost is equal to average
  ifelse (objective = "history" and hist-1st-rond = true)
  [
    refine-food-share-w-updated-budget price-per-cal
  ]
  [
    ifelse (Decision-process = "Price-per-Calorie")
    [
      refine-food-share price-per-cal
    ]
    [
      ifelse (Decision-process = "Price-per-Gram")
      [
        refine-food-share price-per-gram
      ]
      [ ;;Price-per-Serving
        refine-food-share price-per-serving
      ]
    ]
  ]
end
;^^^^^^^^^^^^^^^^^^^^^^^^^^^^^^^^^^^^^^^^^^^^^^^^^^^^^^^^^^^^^^^^^^^^^^^^^^^^^^^^^^^^^^^^^^  set-age  ^^^^^^^^^^^^^^^^^^^^^^^^^^^^^^^^^^^^^^^^^^^^^^^^^^^^^^^^^^^^^^^^^^^^^^^^^^^^^^^^^^^^^^^^^^
to-report set-age
  let age-dist [6.8 7.3 7.3 7.2 6.7 6.9 7.3 8.1 8.0 7.1 6.2 4.8 3.8 3.4 3.1 2.6 1.8 1.0 0.4 0.1 ] ;;age distribution based on https://www.census.gov/prod/2001pubs/c2kbr01-12.pdf

  let i 0
  let age-dist-cum [];;cumulitive
  while [i < length age-dist]
  [
    set age-dist-cum lput (item i age-dist + sum age-dist-cum) age-dist-cum
    set i i + 1
  ]


  let age-found? false
  let r-age -1 ;;age to be reported

  while [r-age < 20]
  [
    let temp random-float 100
    set i 0
    let indx-found? false
    while [i < length age-dist and not indx-found?]
    [
      ifelse (temp < item i age-dist-cum)
      [set indx-found? true]
      [set i i + 1]
    ]
    set r-age (i * 5 + random 5)
  ]

  report r-age
end
;^^^^^^^^^^^^^^^^^^^^^^^^^^^^^^^^^^^^^^^^^^^^^^^^^^^^^^^^^^^^^^^^^^^^^^^^^^^^^^^^^^^^^^^^^^  set-daily-expenditure  ^^^^^^^^^^^^^^^^^^^^^^^^^^^^^^^^^^^^^^^^^^^^^^^^^^^^^^^^^^^^^^^^^^^^^^^^^^^^^^^^^^^^^^^^^^
to  init-daily-expenditure
  let income-dst [[7911 2.3][19999 0.6][34112 0.3][53724 0.4][107027 1.3]] ;;income after tax distribution for 5 quantiles http://stats.bls.gov/cex/2001/stnderror/quintile.pdf
  let food-% [17.3 15.7 14.1 13.8 11.8] ;;percentages from income that go for food http://stats.bls.gov/cex/2001/share/quintile.pdf
  let i random 5
  set day-income (random-normal (item 0 item i income-dst) ((item 1 item i income-dst) * (item 0 item i income-dst) / 100)) ;;income-dst elements are in the form of (mean CV)
  set day-food-expend  day-income * item i food-%  / (100 * 365) ;; 100 is for percentage and 365 is for year to day
  set inc-quant i ;;save value of i as it shows the income qunatile of the person
;  set day-food-expend (random-normal 5320.89 66.51) / 365 ;;daily food expenditure per person obtained from http://stats.bls.gov/cex/2001/stnderror/quintile.pdf  SD is derived from CV and mean
  let FAFH  0.4222 * day-food-expend ;;daily expense for food away from home based on http://stats.bls.gov/cex/2001/share/quintile.pdf (5.7% of 13.5% is equal to 42.22% )
;  let FAFH-non-food (FAFH * 73) / 173 ;;the price that doesn't relate to the food is removed based on table 11 of http://www.ers.usda.gov/data-products/food-expenditures.aspx for the year 2001
  let FAFH-non-food FAFH * (168.4 / 268.4)  ;;the price that doesn't relate to the food is removed based on table 11 of http://www.ers.usda.gov/data-products/food-expenditures.aspx for the year 2001
  set day-food-expend day-food-expend - FAFH-non-food ;;the expense which doesn't explictely go for foood is removed
end
;^^^^^^^^^^^^^^^^^^^^^^^^^^^^^^^^^^^^^^^^^^^^^^^^^^^^^^^^^^^^^^^^^^^^^^^^^^^^^^^^^^^^^^^^^^  set-level40  ^^^^^^^^^^^^^^^^^^^^^^^^^^^^^^^^^^^^^^^^^^^^^^^^^^^^^^^^^^^^^^^^^^^^^^^^^^^^^^^^^^^^^^^^^^
to set-level40
  let daily-expend sort [day-food-expend] of persons
  set level40 item round (0.4 * length daily-expend) daily-expend
end
;^^^^^^^^^^^^^^^^^^^^^^^^^^^^^^^^^^^^^^^^^^^^^^^^^^^^^^^^^^^^^^^^^^^^^^^^^^^^^^^^^^^^^^^^^^  increase-income  ^^^^^^^^^^^^^^^^^^^^^^^^^^^^^^^^^^^^^^^^^^^^^^^^^^^^^^^^^^^^^^^^^^^^^^^^^^^^^^^^^^^^^^^^^^
to increase-income ;;increase income first and then recalculate the food-expenditure based on the percentage values
  ifelse (objective = "elasticity")
  [
    set day-income (1.01 * day-income)

    let food-% [17.3 15.7 14.1 13.8 11.8] ;;percentages from income that go for food http://stats.bls.gov/cex/2001/share/quintile.pdf
    set day-food-expend  day-income * item inc-quant food-%  / (100 * 365) ;; 100 is for percentage and 365 is for year to day
    let FAFH  0.4222 * day-food-expend ;;daily expense for food away from home based on http://stats.bls.gov/cex/2001/share/quintile.pdf (5.7% of 13.5% is equal to 42.22% )
    let FAFH-non-food FAFH * (168.4 / 268.4)  ;;the price that doesn't relate to the food is removed based on table 11 of http://www.ers.usda.gov/data-products/food-expenditures.aspx for the year 2001
    set day-food-expend day-food-expend - FAFH-non-food ;;the expense which doesn't explictely go for foood is removed
  ]
  [;;for history
    ask persons with [day-food-expend <= level40]
    [
      set day-food-expend (calculate-cost avg-cal-% daily-EI);;set food-budget equal to cost of mean-diet: now everyone can afford mean diet
    ]
  ]
end
;^^^^^^^^^^^^^^^^^^^^^^^^^^^^^^^^^^^^^^^^^^^^^^^^^^^^^^^^^^^^^^^^^^^^^^^^^^^^^^^^^^^^^^^^^^  update-food-prices  ^^^^^^^^^^^^^^^^^^^^^^^^^^^^^^^^^^^^^^^^^^^^^^^^^^^^^^^^^^^^^^^^^^^^^^^^^^^^^^^^^^^^^^^^^^
;;every month (day=tick) food prices change. They follow  normal distributions with indicated mean and SD
to update-food-prices-cal
  set price-per-cal make-list [[0.23 0.13][0.41 0.31][0.22 0.14][0.18 0.17][0.14 0.10][0.54 0.48][0.68 0.69][0.17 0.19][0.22 0.21]]
end
;;^^^^^^^^^^^^^^^^^^^^^^^^^^^^^^^^^^^^^^^^^^^^^^^^^^^^^^^^^^^^^^^^^^^^^^^^^^^^^^^^^^^^^^^^^^  update-food-prices-gr  ^^^^^^^^^^^^^^^^^^^^^^^^^^^^^^^^^^^^^^^^^^^^^^^^^^^^^^^^^^^^^^^^^^^^^^^^^^^^^^^^^^^^^^^^^^
to update-food-prices-gr
  set price-per-gram make-list [[0.40 0.31][0.80 0.44][0.32 0.16][0.50 0.47][0.47 0.30][0.28 0.22][0.33 0.26][0.37 0.18][0.40 0.41]]
end
;;^^^^^^^^^^^^^^^^^^^^^^^^^^^^^^^^^^^^^^^^^^^^^^^^^^^^^^^^^^^^^^^^^^^^^^^^^^^^^^^^^^^^^^^^^^  update-food-prices-serving  ^^^^^^^^^^^^^^^^^^^^^^^^^^^^^^^^^^^^^^^^^^^^^^^^^^^^^^^^^^^^^^^^^^^^^^^^^^^^^^^^^^^^^^^^^^
to update-food-prices-serving
  set  price-per-serving make-list [[0.26 0.17][0.63 0.38][0.24 0.21][0.26 0.22][0.23 0.20][0.40 0.33][0.29 0.33][0.09 0.08][0.23 0.18]]
end
;^^^^^^^^^^^^^^^^^^^^^^^^^^^^^^^^^^^^^^^^^^^^^^^^^^^^^^^^^^^^^^^^^^^^^^^^^^^^^^^^^^^^^^^^^^  set-food-%  ^^^^^^^^^^^^^^^^^^^^^^^^^^^^^^^^^^^^^^^^^^^^^^^^^^^^^^^^^^^^^^^^^^^^^^^^^^^^^^^^^^^^^^^^^^
to set-food-consumption-avg
  set avg-cal-% [0.107 0.186 0.019 0.031 0.334 0.048 0.078 0.030 0.166]  ;;adults only NHANES
 ;  set avg-cal-% [0.13 0.17 0.02 0.03 0.34 0.05 0.07 0.03 0.16] ;;kids and adults NHANES
 ;  set avg-cal-% [0.094 0.180 0.0194 0.036 0.35 0.075 0.0694 0.027 0.15] ;;for adults
 ;  set kid-avg-cal-% [0.386 0.167 0.15 0.122 0.072 0.044 0.019 0.019 0.019] ;;for kids

  set avg-cal-c-% []
  let i 0
  while [i < length food-types]
  [set avg-cal-c-% lput ((1 - item i avg-cal-%) / (length food-types - 1))  avg-cal-c-%        set i i + 1]

  set avg-diet-cum [0.107]
  set avg-diet-c-cum [0.111625]  ;;[(1 - 0.107) / (length food-types - 1)]
  set  min-cal-% [0 0 0 0 0.0972 0 0 0 0] ;;10% percentile
  set  max-cal-% [0.24 0.38 0.0817 0.1244 0.5708 0.135 0.1919 0.0953 0.3555]  ;;90% percentile
  set i 1
  while [i < length food-types]
  [
    set avg-diet-cum lput (item i avg-cal-% + item (i - 1) avg-diet-cum) avg-diet-cum
    set avg-diet-c-cum lput ((1 - item i avg-cal-%) / (length food-types - 1) + item (i - 1) avg-diet-c-cum) avg-diet-c-cum
    set i i + 1
  ]

  set avg-diet-cum replace-item 8 avg-diet-cum 1 ;;last item is a bit smaller than 1
end
;^^^^^^^^^^^^^^^^^^^^^^^^^^^^^^^^^^^^^^^^^^^^^^^^^^^^^^^^^^^^^^^^^^^^^^^^^^^^^^^^^^^^^^^^^^  set-food-probabilities  ^^^^^^^^^^^^^^^^^^^^^^^^^^^^^^^^^^^^^^^^^^^^^^^^^^^^^^^^^^^^^^^^^^^^^^^^^^^^^^^^^^^^^^^^^^
to set-food-probabilities
  let price-elasticity [0.58 0.69 0.27 0.12 0.60 0.70 0.58 0.48 0.34];; based on http://ajph.aphapublications.org/doi/pdf/10.2105/AJPH.2008.151415
  let temp-inc-list []
  let temp-dec-list []
  let i 0
  while [i < length food-types]
  [
    set temp-inc-list lput (item i avg-cal-% * item i price-elasticity) temp-inc-list ;;creating the first parts
    set temp-dec-list lput (item i avg-cal-c-% * item i price-elasticity) temp-dec-list
    set i i + 1
  ]


  let sum-m sum temp-inc-list ;;sum multiplications
  let sum-c sum temp-dec-list
  set foods-pr-cum (list (first temp-inc-list / sum-m) ) ;these two commands are for adding the first items of the list
  set foods-pr-c-cum (list (first temp-dec-list / sum-c) )

  set i 1
  while [i < length food-types]
  [
    set foods-pr-cum lput ((item i temp-inc-list / sum-m)  + item (i - 1) foods-pr-cum) foods-pr-cum
    set foods-pr-c-cum lput ((item i temp-dec-list / sum-c) + item (i - 1) foods-pr-c-cum) foods-pr-c-cum
    set i i + 1
  ]

  set foods-pr-cum replace-item 8 foods-pr-cum 1 ;;last item is a bit smaller than 1` (0.9999999999999)

  show foods-pr-cum
  show foods-pr-c-cum
end
;^^^^^^^^^^^^^^^^^^^^^^^^^^^^^^^^^^^^^^^^^^^^^^^^^^^^^^^^^^^^^^^^^^^^^^^^^^^^^^^^^^^^^^^^^^  set-energy-density  ^^^^^^^^^^^^^^^^^^^^^^^^^^^^^^^^^^^^^^^^^^^^^^^^^^^^^^^^^^^^^^^^^^^^^^^^^^^^^^^^^^^^^^^^^^
to set-energy-density
  set  energy-density make-list [[182 112][224 98][171 74][330 217][337 110][67 56][83 80][390 226][242 190]]
end
;^^^^^^^^^^^^^^^^^^^^^^^^^^^^^^^^^^^^^^^^^^^^^^^^^^^^^^^^^^^^^^^^^^^^^^^^^^^^^^^^^^^^^^^^^^  set-serving-size  ^^^^^^^^^^^^^^^^^^^^^^^^^^^^^^^^^^^^^^^^^^^^^^^^^^^^^^^^^^^^^^^^^^^^^^^^^^^^^^^^^^^^^^^^^^
to set-serving-size
  set serving-size make-list [[112 89][89 51][65 28][76 62][63 53][157 77][102 59][22 9][119 102]]
end
;;^^^^^^^^^^^^^^^^^^^^^^^^^^^^^^^^^^^^^^^^^^^^^^^^^^^^^^^^^^^^^^^^^^^^^^^^^^^^^^^^^^^^^^^^^^  make-list  ^^^^^^^^^^^^^^^^^^^^^^^^^^^^^^^^^^^^^^^^^^^^^^^^^^^^^^^^^^^^^^^^^^^^^^^^^^^^^^^^^^^^^^^^^^
to-report make-list [input-list]
  let i 0
  let output-list []
  while [i < length input-list]
  [
    let temp 0
    while [temp < 0.01] ;;should be greater than 0.01
    [set temp random-normal item 0 item i input-list item 1 item i input-list]
    set output-list lput temp output-list
    set i i + 1
  ]
  report  output-list
end
;;^^^^^^^^^^^^^^^^^^^^^^^^^^^^^^^^^^^^^^^^^^^^^^^^^^^^^^^^^^^^^^^^^^^^^^^^^^^^^^^^^^^^^^^^^^  calculate-cost  ^^^^^^^^^^^^^^^^^^^^^^^^^^^^^^^^^^^^^^^^^^^^^^^^^^^^^^^^^^^^^^^^^^^^^^^^^^^^^^^^^^^^^^^^^
;;reports cost based on current of food consumpotion and current food price
to-report calculate-cost [sharelist EI ]

  let i 0 ;;counter
  let cost 0
  ifelse (Decision-process = "Price-per-Calorie")
  [
    while [i < length sharelist] ;;do this for number of food categories
    [
      set cost cost + ( (item i sharelist * EI) *  item i price-per-cal / 100000)
      set i i + 1 ;;increment counter
    ]
  ]
  [
    ifelse (Decision-process = "Price-per-Gram")
    [
      while [i < length sharelist] ;;do this for number of food categories
      [
        set cost cost + ( ( (item i sharelist * EI) / 1000) * 100 / item i energy-density ) * item i price-per-gram / 100
        set i i + 1 ;;increment counter
      ]
    ]
    [ ;;"Price-per-Serving"
      while [i < length sharelist] ;;do this for number of food categories
      [
        set cost cost + (((((item i sharelist * EI) / 1000) * 100 / item i energy-density ) / item i serving-size) * item i price-per-serving)
        set i i + 1 ;;increment counter
      ]
    ]
  ]
  report cost
end
;^^^^^^^^^^^^^^^^^^^^^^^^^^^^^^^^^^^^^^^^^^^^^^^^^^^^^^^^^^^^^^^^^^^^^^^^^^^^^^^^^^^^^^^^^^  refine-food-share  ^^^^^^^^^^^^^^^^^^^^^^^^^^^^^^^^^^^^^^^^^^^^^^^^^^^^^^^^^^^^^^^^^^^^^^^^^^^^^^^^^^^^^^^^^^
;change average diet such that it meets the that the person can spend
to refine-food-share [decison-price-list]

  let j 0
  let cost calculate-cost food-share daily-EI
  let c 0.005 ;;constant value to be added or subtracted from current values in order to adjust

  while [cost > day-food-expend ] ;;until the cost doesn't meet person's budget
  [
    let indx1 random-mean true
    let indx2 random-mean false
    if (item indx1 decison-price-list > item indx2 decison-price-list) ;;take two random entries of food-share, while the first has greater
    [
      ;    if (item indx2 food-share > 0.01 )  ;;if it's certainly possible to decrease
      if ((item indx1 food-share > (item indx1 min-cal-% + c) ) and (item indx2 food-share < (item indx2 max-cal-% - c) ))
      [

        set food-share replace-item indx1 food-share (item indx1 food-share - c) ;;increase by some constant

        set food-share replace-item indx2 food-share (item indx2 food-share + c) ;;decrease by some constant
      ]
    ]
    set cost calculate-cost food-share daily-EI

    set j j + 1
    if (j > 1000) [ stop] ;;sometimes this becomes an infinite loop. since there is no way to have that cheap diiet with current food price
  ]
end
;^^^^^^^^^^^^^^^^^^^^^^^^^^^^^^^^^^^^^^^^^^^^^^^^^^^^^^^^^^^^^^^^^^^^^^^^^^^^^^^^^^^^^^^^^^  refine-food-share-w-updated-budget  ^^^^^^^^^^^^^^^^^^^^^^^^^^^^^^^^^^^^^^^^^^^^^^^^^^^^^^^^^^^^^^^^^^^^^^^^^^^^^^^^^^^^^^^^^^
to refine-food-share-w-updated-budget [decison-price-list] ;;refine current diet with new budget that the agent has, after her budget was increased
   let j 0
  let cost calculate-cost food-share daily-EI
  let c 0.005 ;;constant value to be added or subtracted from current values in order to adjust

  while [cost < day-food-expend ] ;;until the cost doesn't meet person's budget
  [
    let indx1 random-mean true
    let indx2 random-mean false
    if (item indx1 decison-price-list < item indx2 decison-price-list) ;;take two random entries of food-share, while the first has greater
    [
      ;    if (item indx2 food-share > 0.01 )  ;;if it's certainly possible to decrease
      if ((item indx1 food-share > (item indx1 min-cal-% + c) ) and (item indx2 food-share < (item indx2 max-cal-% - c) ))
      [

        set food-share replace-item indx1 food-share (item indx1 food-share - c) ;;increase by some constant

        set food-share replace-item indx2 food-share (item indx2 food-share + c) ;;decrease by some constant
      ]
    ]
    set cost calculate-cost food-share daily-EI

    set j j + 1
    if (j > 1000) [ stop] ;;sometimes this becomes an infinite loop. since there is no way to have that cheap diiet with current food price
  ]
end
;^^^^^^^^^^^^^^^^^^^^^^^^^^^^^^^^^^^^^^^^^^^^^^^^^^^^^^^^^^^^^^^^^^^^^^^^^^^^^^^^^^^^^^^^^^  ok-to-decrease?  ^^^^^^^^^^^^^^^^^^^^^^^^^^^^^^^^^^^^^^^^^^^^^^^^^^^^^^^^^^^^^^^^^^^^^^^^^^^^^^^^^^^^^^^^^^
;;reports an index between 0 and food numbers based on probabilities of avg-cal-% or complement of those probabilities
to-report random-mean [direct-prb?]
  ;  avg-diet-cum
  let i 0
  let temp random-float 1

  ifelse (direct-prb?)
  [
    while [i < length food-types]
    [
      if (temp < item i foods-pr-cum)
      [report i]
      set i i + 1
    ]
  ]
  [
    while [i < length food-types]
    [
      if (temp < item i foods-pr-c-cum)
      [report i]
      set i i + 1
    ]
  ]

  report -1
end
;^^^^^^^^^^^^^^^^^^^^^^^^^^^^^^^^^^^^^^^^^^^^^^^^^^^^^^^^^^^^^^^^^^^^^^^^^^^^^^^^^^^^^^^^^^  update-food-share-avg  ^^^^^^^^^^^^^^^^^^^^^^^^^^^^^^^^^^^^^^^^^^^^^^^^^^^^^^^^^^^^^^^^^^^^^^^^^^^^^^^^^^^^^^^^^^
;;adds average food-share for the whole population to the food-share-avg list
to update-food-share-avg
  let i 0
  let tbd []
  let temp 0

  while [i < length food-types]
  [
    ifelse (objective = "diet-%")
      [set temp mean ([item i food-share] of persons with [day-food-expend <= level40])]
      [set temp mean ([item i food-share] of persons with [hist-flag = true])] ;;so it's history
    set tbd lput temp tbd
    set i i + 1
  ]

    set food-share-avg-dtl lput tbd food-share-avg-dtl
end
;^^^^^^^^^^^^^^^^^^^^^^^^^^^^^^^^^^^^^^^^^^^^^^^^^^^^^^^^^^^^^^^^^^^^^^^^^^^^^^^^^^^^^^^^^^  set-food-share-aggregare  ^^^^^^^^^^^^^^^^^^^^^^^^^^^^^^^^^^^^^^^^^^^^^^^^^^^^^^^^^^^^^^^^^^^^^^^^^^^^^^^^^^^^^^^^^^
;;records the final average food-share for the whole population
;;calculate sum and then divide by the count
to set-food-share-aggregare
  let sum-list [0 0 0 0 0 0 0 0 0]
  let i 0

  while [i < length food-share-avg-dtl]
  [
    let j 0
    while [ j < length food-types]
    [
      set sum-list replace-item j sum-list (item j item i food-share-avg-dtl + item j sum-list)
      set j j + 1
    ]
    set i i + 1
  ]

  set i 0
  set food-share-avg-agr []

  while [ i < length food-types]
  [
    set food-share-avg-agr lput (item i sum-list / length food-share-avg-dtl) food-share-avg-agr
    set i i + 1
  ]

end
;^^^^^^^^^^^^^^^^^^^^^^^^^^^^^^^^^^^^^^^^^^^^^^^^^^^^^^^^^^^^^^^^^^^^^^^^^^^^^^^^^^^^^^^^^^  update-food-score  ^^^^^^^^^^^^^^^^^^^^^^^^^^^^^^^^^^^^^^^^^^^^^^^^^^^^^^^^^^^^^^^^^^^^^^^^^^^^^^^^^^^^^^^^^^
;;minimum score for zero serving = 0 and for max score when meet or exceed the recommended serving = 10
to update-food-score

  let to-be-added []
  let i 0
  let indx1 -1 ;;indx1 and indx2 for accessing max-score list
  let indx2 -1

  ifelse (gender = "female")
  [ set indx1 0]
  [ set indx1 1]

  ifelse (age < 25 )
  [set indx2 0]
  [
    ifelse (age < 51)
      [set indx2 1]
      [set indx2 2]
  ]


  while [i < length food-types]
  [
    ifelse( item i item indx2 item indx1 max-score != "x")
      [
        set  to-be-added lput ( min list 10 ((((item i food-share * daily-EI) * item i price-per-cal / 100000) / item i price-per-serving) * 10 / item i item indx2 item indx1 max-score)) to-be-added ;;getting to the number of servings from the food-share percentages
      ]
      [set to-be-added lput "x" to-be-added]
    set i i + 1
  ]

  set food-score-detail lput to-be-added food-score-detail

end
;^^^^^^^^^^^^^^^^^^^^^^^^^^^^^^^^^^^^^^^^^^^^^^^^^^^^^^^^^^^^^^^^^^^^^^^^^^^^^^^^^^^^^^^^^^  set-food-score-aggregateyou  ^^^^^^^^^^^^^^^^^^^^^^^^^^^^^^^^^^^^^^^^^^^^^^^^^^^^^^^^^^^^^^^^^^^^^^^^^^^^^^^^^^^^^^^^^^
to set-food-score-aggregate
  ask persons with [day-food-expend <= level40]
  [
    set food-score-overal []
    let i 0

    while [i < length food-types]
    [
      ifelse (item i main-foods != "x") ;;items that are equal to "x" are same in female and male list
      [
        let temp 0
        let j 0
        while [j < length food-score-detail]
        [
          set temp temp + item i item j food-score-detail
          set j j + 1
        ]
        set temp temp / length food-score-detail ;;mean of item i accross the whole list of food-score-detail is calculated here
        set  food-score-overal lput temp food-score-overal
      ]
      [set food-score-overal lput "x" food-score-overal]
      set i i + 1
    ]
  ]

  let i 0
  set food-score-avg []
  while [i < length food-types]
  [
    ifelse (item i main-foods != "x")
      [
        set food-score-avg lput mean ([item i food-score-overal] of persons with [day-food-expend <= level40]) food-score-avg
      ]
      [set food-score-avg  lput "x" food-score-avg ]
    set i i + 1
  ]
end
;^^^^^^^^^^^^^^^^^^^^^^^^^^^^^^^^^^^^^^^^^^^^^^^^^^^^^^^^^^^^^^^^^^^^^^^^^^^^^^^^^^^^^^^^^^  set-food-consumption-aggregate  ^^^^^^^^^^^^^^^^^^^^^^^^^^^^^^^^^^^^^^^^^^^^^^^^^^^^^^^^^^^^^^^^^^^^^^^^^^^^^^^^^^^^^^^^^^
to save-food-consumption ;;weight of total consumed food

  ifelse (not elas-1st-rond)
    [
      ask persons with [day-food-expend <= level40]
      [
        let i 0
        while [i < length food-types]
        [
          set cons-bfr replace-item i cons-bfr (item i cons-bfr + (( (item i food-share * daily-ei) / 1000) * 100 / item i energy-density ))
          set i i + 1
        ]
      ]
    ]
    [
      ask persons with [els-flag = true]
      [
        let i 0
        while [i < length food-types]
        [
          set cons-aftr replace-item i cons-aftr (item i cons-aftr + (( (item i food-share * daily-ei) / 1000) * 100 / item i energy-density ))
          set i i + 1
        ]
      ]
    ]
end
  ;^^^^^^^^^^^^^^^^^^^^^^^^^^^^^^^^^^^^^^^^^^^^^^^^^^^^^^^^^^^^^^^^^^^^^^^^^^^^^^^^^^^^^^^^^^  set-elasticity  ^^^^^^^^^^^^^^^^^^^^^^^^^^^^^^^^^^^^^^^^^^^^^^^^^^^^^^^^^^^^^^^^^^^^^^^^^^^^^^^^^^^^^^^^^^
to set-elasticity
  ask persons with [els-flag = true]
  [
    set indv-elas []
    let i 0
    while [i < length food-types]
    [
      set indv-elas lput (((item i cons-aftr - item i cons-bfr) / item i cons-bfr) * 100) indv-elas ;;percent change in demand
      set i i + 1
    ]
  ]
;; ask persons with [els-flag = true] [show indv-elas]

  let i 0
  set income-elasticity []
  while [i < length food-types]
    [
      set income-elasticity lput (mean [item i indv-elas] of persons with [els-flag = true]) income-elasticity
      set i i + 1
    ]
end
;^^^^^^^^^^^^^^^^^^^^^^^^^^^^^^^^^^^^^^^^^^^^^^^^^^^^^^^^^^^^^^^^^^^^^^^^^^^^^^^^^^^^^^^^^^  update-annual-conumption  ^^^^^^^^^^^^^^^^^^^^^^^^^^^^^^^^^^^^^^^^^^^^^^^^^^^^^^^^^^^^^^^^^^^^^^^^^^^^^^^^^^^^^^^^^^
to update-annual-conumption
  let i 0
  while [i < length food-types]
  [
    let temp ((((item i food-share * daily-EI) * item i price-per-cal / 100000) * 100 / item i price-per-gram) * 0.00220462) ;;getting to the daily weight of consumed food from the food-share percentages
    set annual-consumption replace-item i annual-consumption (item i annual-consumption + temp)
    set i i + 1
  ]
end
;^^^^^^^^^^^^^^^^^^^^^^^^^^^^^^^^^^^^^^^^^^^^^^^^^^^^^^^^^^^^^^^^^^^^^^^^^^^^^^^^^^^^^^^^^^  update-plot  ^^^^^^^^^^^^^^^^^^^^^^^^^^^^^^^^^^^^^^^^^^^^^^^^^^^^^^^^^^^^^^^^^^^^^^^^^^^^^^^^^^^^^^^^^^
to update-plot
  set-current-plot "Food-Distribution"

  let i 0
  while [i < length food-types]
  [
    set-current-plot-pen item i food-types ;;choose one of food types

    plotxy ticks mean ([item i food-share * daily-EI] of persons with [day-food-expend <= level40]) / 1000 ;;plot average consumption of percentage of that specific food type
    set i i + 1
  ]


  set-current-plot "Food-Score"
  set i 0
  while [i < length food-types]
  [
    if (item i main-foods != "x") ;;items that are equal to "x" are same in female and male list
    [
      set-current-plot-pen item i food-types ;;choose one of food types
      plotxy ticks mean ([item i food-score-overal] of persons with [day-food-expend <= level40])
    ]
    set i i + 1
  ]
end
;^^^^^^^^^^^^^^^^^^^^^^^^^^^^^^^^^^^^^^^^^^^^^^^^^^^^^^^^^^^^^^^^^^^^^^^^^^^^^^^^^^^^^^^^^^  update-food-consumption-plot  ^^^^^^^^^^^^^^^^^^^^^^^^^^^^^^^^^^^^^^^^^^^^^^^^^^^^^^^^^^^^^^^^^^^^^^^^^^^^^^^^^^^^^^^^^^
to update-food-consumption-plot
  set-current-plot "Food-Consumption"
  let i 0
  let j 1
  while [i < length food-types]
  [
    if (item i main-foods != "x")
    [
      set-current-plot-pen item i food-types ;;choose one of food types
      plotxy j mean ([item i annual-consumption] of persons with [day-food-expend <= level40])
      set j j + 2
    ]
    set i i + 1
  ]
end
;^^^^^^^^^^^^^^^^^^^^^^^^^^^^^^^^^^^^^^^^^^^^^^^^^^^^^^^^^^^^^^^^^^^^^^^^^^^^^^^^^^^^^^^^^^  do1  ^^^^^^^^^^^^^^^^^^^^^^^^^^^^^^^^^^^^^^^^^^^^^^^^^^^^^^^^^^^^^^^^^^^^^^^^^^^^^^^^^^^^^^^^^^
to do1
  let hei csv:from-file "hei.csv"
  let f40 csv:from-file "40.csv"
;  let demog csv:from-file "demog.csv"

  let i 0
  let col1 []
  let match[]
  let result []

  while [i < length hei]
    [
      set col1 lput item 0 item i hei col1
      set i i + 1
    ]

  set i 0

  while [i < length f40]
    [
      if (member? item 0 item i f40 col1)
      [set match lput (item 0 item i f40) match]
      set i i + 1
    ]

  show match
  set i 0
  while [i < length hei]
    [
      if (member? item 0 item i hei match)
      [set result lput item i hei result]
      set i i + 1
    ]

  show result
  csv:to-file "40-hei.csv" result
end
;^^^^^^^^^^^^^^^^^^^^^^^^^^^^^^^^^^^^^^^^^^^^^^^^^^^^^^^^^^^^^^^^^^^^^^^^^^^^^^^^^^^^^^^^^^  do2  ^^^^^^^^^^^^^^^^^^^^^^^^^^^^^^^^^^^^^^^^^^^^^^^^^^^^^^^^^^^^^^^^^^^^^^^^^^^^^^^^^^^^^^^^^^
to do2 ;;calculates mean and SD of percentages of energy intake from each food cartegory
  let IDs csv:from-file "adult-ids.csv"
  let fdind csv:from-file "fd-ind.csv"
;  let demog csv:from-file "demog-adults.csv"

  let i 0

  while [i < length fdind]
    [
      let str ( word item 2 item i fdind)
      let row replace-item 2 (item i fdind) str
      set fdind replace-item i fdind row
      set i i + 1
    ]

  let EIs [] ;;energy intakes
  let percents [] ;food percentages
  let weights []

  set i 0
  let j 0
  while [i < length ids]
    [
      let day-ei 0
      let percs [0 0 0 0 0 0 0 0 0]
      let  m j

      while  [  j < length fdind and item 0 item j fdind <= item 0 item i ids]
      [
        if (item 0 item j fdind = item 0 item i ids)
        [

          set day-ei day-ei + item 3 item j fdind
          let code ( read-from-string (item 0 item 2 item j fdind)) - 1 ;;first letter num indicating food code
          set percs replace-item code percs  (item code percs + item 3 item j fdind)  ;index list value

        ]
        set j j + 1
      ]
      ifelse (day-ei = 0) ;;if that entry is not complete
      [
        let n m ;;store value temporary
        while [m < j]
        [set fdind remove-item n fdind     set m m + 1]
        set ids remove-item i ids
        set j n
      ]
      [
        set eis lput day-ei eis
        set weights lput (item 1 item (j - 1) fdind) weights
        let k 0
        while [k < length food-types] [ set percs replace-item k percs (item k percs / day-ei) set k k + 1]
        set percents lput percs percents
        set i i + 1
      ]

    ]
show i
  set percents remove-item (length percents - 1) percents ;;last item for the person with code 21004 is an outlier
  set weights remove-item (length weights - 1) weights ;;last item for the person with code 21004 is an outlier

;  let weights2 []
;  set i 0
;  while [i < length weights]
;  [
;    set weights2 lput (litem i weights) weights2
;    set i i + 1
;  ]
;
;  csv:to-file "weights.csv" weights2
;  csv:to-file "percents.csv" percents   show "hi"
;  @@@@@@@@@@@@@@@ show map [map [100 * ?] ?] percents @@@@@@@@@@@@
  let wssum sum weights ;weight sum
  let weighted-sum [0 0 0 0 0 0 0 0 0]
  let w-mean [0 0 0 0 0 0 0 0 0] ;;weighted mean
  let w-sd [0 0 0 0 0 0 0 0 0] ;;weighted standard deviation

  set i 0


  while [i < length weights]
    [
      set j 0
      while [j < length food-types]
      [
        set weighted-sum replace-item j weighted-sum ( item j weighted-sum + (item i weights * item j item i percents))
        set j j + 1
      ]
      set i i + 1
    ]

  set i 0
  while [i < length food-types]
    [     set w-mean replace-item i w-mean (item i weighted-sum / wssum)   set i i + 1]

  let numerator [0 0 0 0 0 0 0 0 0]
  let denominator [0 0 0 0 0 0 0 0 0]
  set i 0
  while [i < length weights]
    [
      set j 0
      while [j < length food-types]
      [
        set numerator replace-item j numerator (item j numerator + item i weights * ( (item j item i percents - item j w-mean ) ^ 2))
        set j j + 1
      ]
      set i i + 1
    ]

  set i 0
  while [i < length food-types]
  [
    set denominator replace-item i denominator ( ((length percents - 1) / (length percents)) * wssum )
    set w-sd replace-item i w-sd sqrt (item i numerator / item i denominator)
    set i i + 1
  ]

;  show map [precision ? 3]  w-mean
;  show map [precision ? 3] w-sd

  show w-mean
  show w-sd

end
;^^^^^^^^^^^^^^^^^^^^^^^^^^^^^^^^^^^^^^^^^^^^^^^^^^^^^^^^^^^^^^^^^^^^^^^^^^^^^^^^^^^^^^^^^^  do3  ^^^^^^^^^^^^^^^^^^^^^^^^^^^^^^^^^^^^^^^^^^^^^^^^^^^^^^^^^^^^^^^^^^^^^^^^^^^^^^^^^^^^^^^^^^
to do3
   let res csv:from-file "res.csv"
   let fdind csv:from-file "fdind.csv"
   let f40-w-sc [] ;; in form of [id weight grain-sc friut-sc veggie-sc meat-sc dairy-sc]

   let i 0
   let j 0
   while [i < length fdind]
   [
     if (j < length res and item 0 item i fdind = item 0 item j res)
     [
       let temp  (list (item 0 item i fdind) (item 1 item i fdind) (item 5 item j res) (item 6 item j res) (item 7 item j res) (item 8 item j res) (item 9 item j res) )
       set f40-w-sc lput temp f40-w-sc
       set j j + 1
     ]
     set i i + 1
   ]

   let wsum 0
   set i 0
   while [i < length f40-w-sc] [set wsum wsum + item 1 item i  f40-w-sc    set i i + 1]

   let weighted-sum [0 0 0 0 0]
   set i 0
   while [i < length f40-w-sc]
   [
     set j 0
     while [j < 5]
     [
       set weighted-sum replace-item j weighted-sum (item j weighted-sum + item 1 item i f40-w-sc * item (j + 2) item i f40-w-sc);indx list value
       set j j + 1
     ]
     set i i + 1
   ]

   let w-mean [0 0 0 0 0]
   set i 0
   while [i < 5]
     [
       set w-mean replace-item i w-mean (item i weighted-sum / wsum)
       set i i + 1
     ]
show w-mean

end
;^^^^^^^^^^^^^^^^^^^^^^^^^^^^^^^^^^^^^^^^^^^^^^^^^^^^^^^^^^^^^^^^^^^^^^^^^^^^^^^^^^^^^^^^^^  do4  ^^^^^^^^^^^^^^^^^^^^^^^^^^^^^^^^^^^^^^^^^^^^^^^^^^^^^^^^^^^^^^^^^^^^^^^^^^^^^^^^^^^^^^^^^^
to do4
  let sim-sc csv:from-file "sim-sc.csv"
  show length sim-sc
  show item 3 item 5 sim-sc
end

;^^^^^^^^^^^^^^^^^^^^^^^^^^^^^^^^^^^^^^^^^^^^^^^^^^^^^^^^^^^^^^^^^^^^^^^^^^^^^^^^^^^^^^^^^^  do5  ^^^^^^^^^^^^^^^^^^^^^^^^^^^^^^^^^^^^^^^^^^^^^^^^^^^^^^^^^^^^^^^^^^^^^^^^^^^^^^^^^^^^^^^^^^
to do5 ;;does what Tak asked for. generates file contaning aggregate diet info for indviduals
  let IDs csv:from-file "unique-ids.csv"
  let fdind csv:from-file "fd-ind.csv"
;  let demog csv:from-file "demog-adults.csv"

  let i 0

  while [i < length fdind]
    [
      let str ( word item 2 item i fdind)
      let row replace-item 2 (item i fdind) str
      set fdind replace-item i fdind row
      set i i + 1
    ]

  let EIs [] ;;energy intakes
  let percents [] ;food percentages
  let weights []
  let total-ei [] ;;total energy intake

  set i 0
  let j 0
  while [i < length ids]
    [
      let day-ei 0
      let percs [0 0 0 0 0 0 0 0 0]
      let  m j

      while  [  j < length fdind and item 0 item j fdind <= item 0 item i ids]
      [
        if (item 0 item j fdind = item 0 item i ids)
        [

          set day-ei day-ei + item 3 item j fdind
          let code ( read-from-string (item 0 item 2 item j fdind)) - 1 ;;first letter num indicating food code
          set percs replace-item code percs  (item code percs + item 3 item j fdind)  ;index list value

        ]
        set j j + 1
      ]
      ifelse (day-ei = 0) ;;if that entry is not complete
      [
        let n m ;;store value temporary
        while [m < j]
        [set fdind remove-item n fdind     set m m + 1]
        set ids remove-item i ids
        set j n
      ]
      [
        set eis lput day-ei eis
        set weights lput (item 1 item (j - 1) fdind) weights
        let k 0
        while [k < length food-types] [ set percs replace-item k percs (item k percs / day-ei) set k k + 1]
        set percents lput percs percents
        set total-ei lput day-ei total-ei
        set i i + 1
      ]

    ]

;  set percents remove-item (length percents - 1) percents ;;last item for the person with code 21004 is an outlier
;  set weights remove-item (length weights - 1) weights ;;last item for the person with code 21004 is an outlier

  let aggregate []
  set i 0
  while [i < length ids]
  [
    set aggregate lput (list (item 0 item i ids) (item i weights) (item i total-ei) (item 0 item i percents)  (item 1 item i percents)  (item 2 item i percents)  (item 3 item i percents)  (item 4 item i percents)  (item 5 item i percents)  (item 6 item i percents)  (item 7 item i percents)  (item 8 item i percents)) aggregate
    set i i + 1
  ]

    csv:to-file "aggregate.csv" aggregate
end
;^^^^^^^^^^^^^^^^^^^^^^^^^^^^^^^^^^^^^^^^^^^^^^^^^^^^^^^^^^^^^^^^^^^^^^^^^^^^^^^^^^^^^^^^^^  do6  ^^^^^^^^^^^^^^^^^^^^^^^^^^^^^^^^^^^^^^^^^^^^^^^^^^^^^^^^^^^^^^^^^^^^^^^^^^^^^^^^^^^^^^^^^^
to do6 ;;dervies age and income from the main NHANES demog table and matches that to the aggregate tabels generated above
  let IDs csv:from-file "aggregate-ids.csv"
  let age-income csv:from-file "age-income.csv"

  let matched-id-inc []

  let i 1 ;;first row is title
  while [i < length IDs]
  [
    let j 1
    let notfound? true
    while [j < length age-income and notfound?]
    [
      if (item 0 item i IDs = item 0 item j age-income)
      [
        set matched-id-inc lput (item j age-income) matched-id-inc
        set notfound? false
      ]
      set j j + 1
    ]
    set i i + 1
  ]

  csv:to-file "id-age-income.csv" matched-id-inc
end

;^^^^^^^^^^^^^^^^^^^^^^^^^^^^^^^^^^^^^^^^^^^^^^^^^^^^^^^^^^^^^^^^^^^^^^^^^^^^^^^^^^^^^^^^^^  do7  ^^^^^^^^^^^^^^^^^^^^^^^^^^^^^^^^^^^^^^^^^^^^^^^^^^^^^^^^^^^^^^^^^^^^^^^^^^^^^^^^^^^^^^^^^^
to do7 ;;finds percentiles (95th and 5th - 80 and 20 - 75 and 25 ...)
  let IDs csv:from-file "adult-ids.csv"
  let fdind csv:from-file "fd-ind.csv"
;  let demog csv:from-file "demog-adults.csv"

  let i 0

  while [i < length fdind]
    [
      let str ( word item 2 item i fdind)
      let row replace-item 2 (item i fdind) str
      set fdind replace-item i fdind row
      set i i + 1
    ]

  let EIs [] ;;energy intakes
  let percents [] ;food percentages
  let weights []

  set i 0
  let j 0
  while [i < length ids]
    [
      let day-ei 0
      let percs [0 0 0 0 0 0 0 0 0]
      let  m j

      while  [  j < length fdind and item 0 item j fdind <= item 0 item i ids]
      [
        if (item 0 item j fdind = item 0 item i ids)
        [

          set day-ei day-ei + item 3 item j fdind
          let code ( read-from-string (item 0 item 2 item j fdind)) - 1 ;;first letter num indicating food code
          set percs replace-item code percs  (item code percs + item 3 item j fdind)  ;index list value

        ]
        set j j + 1
      ]
      ifelse (day-ei = 0) ;;if that entry is not complete
      [
        let n m ;;store value temporary
        while [m < j]
        [set fdind remove-item n fdind     set m m + 1]
        set ids remove-item i ids
        set j n
      ]
      [
        set eis lput day-ei eis
        set weights lput (item 1 item (j - 1) fdind) weights
        let k 0
        while [k < length food-types] [ set percs replace-item k percs (item k percs / day-ei) set k k + 1]
        set percents lput percs percents
        set i i + 1
      ]

    ]

  set percents remove-item (length percents - 1) percents ;;last item for the person with code 21004 is an outlier
  set weights remove-item (length weights - 1) weights ;;last item for the person with code 21004 is an outlier


  let wssum sum weights ;weight sum
  let food-%-list [[][][][][][][][][]]
  let perc-10 [0 0 0 0 0 0 0 0 0] ;;10th percentile
  let perc-90 [0 0 0 0 0 0 0 0 0] ;;90th percentile

  set i 0
  while [i < length percents]
    [
      set j 0
      while [j < length food-types]
      [
        set food-%-list replace-item j food-%-list (lput (list (item j item i percents) (item i weights)) (item j food-%-list))

        set j j + 1
      ]
      set i i + 1
    ]

  set j 0
  while [j < length food-types]
    [
      set food-%-list replace-item j food-%-list ( sort-by [item 0 ?1 < item 0 ?2] item j food-%-list)
      set j j + 1
    ]

  let indx10 ( 0.25 * wssum) ;based on weights, index of 10th percentile item
  let indx90 ( 0.75 * wssum)
  let tsum 0 ;temp sum


  set j 0
  while [j < length food-types] ;;sort
    [
      set tsum 0
      set i 0
      while [tsum < indx10]
      [
        set tsum tsum + item 1 item i item j food-%-list
        set i i + 1
      ]
      set perc-10 replace-item j perc-10 precision ((item 0 item i item j food-%-list) * 100) 3


      while [tsum < indx90]
      [
        set tsum tsum + item 1 item i item j food-%-list
        set i i + 1
      ]
      set perc-90 replace-item j perc-90 precision ((item 0 item i item j food-%-list) * 100) 3

       set j j + 1
    ]

    show perc-10 show perc-90
end
;^^^^^^^^^^^^^^^^^^^^^^^^^^^^^^^^^^^^^^^^^^^^^^^^^^^^^^^^^^^^^^^^^^^^^^^^^^^^^^^^^^^^^^^^^^  do8  ^^^^^^^^^^^^^^^^^^^^^^^^^^^^^^^^^^^^^^^^^^^^^^^^^^^^^^^^^^^^^^^^^^^^^^^^^^^^^^^^^^^^^^^^^^
to do8 ;;prepares the file for the purpose of accounting for psu (design effects)
  let ids csv:from-file "adult-ids-clustering.csv"
  let fdind csv:from-file "fd-ind.csv"
;  let demog csv:from-file "demog-adults.csv"

  let i 0
 set ids  remove-item 0 ids ;;first row is header
  while [i < length fdind]
    [
      let str ( word item 2 item i fdind)
      let row replace-item 2 (item i fdind) str
      set fdind replace-item i fdind row
      set i i + 1
    ]

;  set i 0
;  while [i < length in-ids]
;    [
;      set ids lput (item 0 item i in-ids) ids
;      set i i + 1
;    ]

  let EIs [] ;;energy intakes
  let percents [] ;food percentages
  let weights []
  let id-psu-str [] ;;ids and psus and strs

  set i 0
  let j 0

  while [i < length ids]
    [
      let day-ei 0
      let percs [0 0 0 0 0 0 0 0 0]
      let  m j

      while  [  j < length fdind and item 0 item j fdind <= item 0 item i ids]
      [
        if (item 0 item j fdind = item 0 item i ids)
        [

          set day-ei day-ei + item 3 item j fdind
          let code ( read-from-string (item 0 item 2 item j fdind)) - 1 ;;first letter num indicating food code
          set percs replace-item code percs  (item code percs + item 3 item j fdind)  ;index list value

        ]
        set j j + 1
      ]
      ifelse (day-ei = 0) ;;if that entry is not complete
      [
        let n m ;;store value temporary
        while [m < j]
        [set fdind remove-item n fdind     set m m + 1]
        set ids remove-item i ids
        set j n
      ]
      [
        set eis lput day-ei eis
        set weights lput (item 1 item (j - 1) fdind) weights
        let k 0
        while [k < length food-types] [ set percs replace-item k percs (item k percs / day-ei) set k k + 1]
        set percents lput percs percents

        set id-psu-str lput item i ids  id-psu-str
        set i i + 1
      ]
    ]

  set percents remove-item (length percents - 1) percents ;;last item for the person with code 21004 is an outlier
  set weights remove-item (length weights - 1) weights ;;last item for the person with code 21004 is an outlier
  set id-psu-str remove-item (length id-psu-str - 1) id-psu-str

  let o-list [] ;;list to be inserted in the output file
  set i 0
  while [i < length percents]
  [
    set o-list lput (sentence item  i id-psu-str item i weights item i percents) o-list
    set i i + 1
  ]
  show i

  csv:to-file "percents.csv" o-list
end
;^^^^^^^^^^^^^^^^^^^^^^^^^^^^^^^^^^^^^^^^^^^^^^^^^^^^^^^^^^^^^^^^^^^^^^^^^^^^^^^^^^^^^^^^^^  p+  ^^^^^^^^^^^^^^^^^^^^^^^^^^^^^^^^^^^^^^^^^^^^^^^^^^^^^^^^^^^^^^^^^^^^^^^^^^^^^^^^^^^^^^^^^^
to-report p+ [num1 num2] ;;add num1 and num2 (plus), in order to avoid floating point number issues
  report ( num1 * 10000 + num2 * 10000 ) / 10000
end
;^^^^^^^^^^^^^^^^^^^^^^^^^^^^^^^^^^^^^^^^^^^^^^^^^^^^^^^^^^^^^^^^^^^^^^^^^^^^^^^^^^^^^^^^^^  s-  ^^^^^^^^^^^^^^^^^^^^^^^^^^^^^^^^^^^^^^^^^^^^^^^^^^^^^^^^^^^^^^^^^^^^^^^^^^^^^^^^^^^^^^^^^^
to-report s- [num1 num2] ;;add num1 and num2 (plus), in order to avoid floating point number issues
  let x1 num1 * 10000 let x2 num2 * 10000
  report ( x1 - x2 ) / 10000
end
@#$#@#$#@
GRAPHICS-WINDOW
230
16
669
476
16
16
13.0
1
10
1
1
1
0
1
1
1
-16
16
-16
16
0
0
1
ticks
30.0

BUTTON
41
41
107
74
setup
setup
NIL
1
T
OBSERVER
NIL
NIL
NIL
NIL
1

BUTTON
149
40
212
73
go
go
T
1
T
OBSERVER
NIL
NIL
NIL
NIL
1

SLIDER
40
107
212
140
num-people
num-people
0
10000
50
100
1
NIL
HORIZONTAL

CHOOSER
41
150
200
195
Decision-process
Decision-process
"Price-per-Calorie" "Price-per-Gram" "Price-per-Serving"
0

PLOT
673
16
1111
311
Food-Distribution
time (day)
average daily calorie intake (kacl)
0.0
10.0
0.0
100.0
true
true
"" ""
PENS
"milk" 1.0 0 -13791810 true "" ""
"meat" 1.0 0 -8630108 true "" ""
"eggs" 1.0 0 -1184463 true "" ""
"beans" 1.0 0 -6459832 true "" ""
"grains" 1.0 0 -955883 true "" ""
"fruits" 1.0 0 -2674135 true "" ""
"vegetables" 1.0 0 -10899396 true "" ""
"fats" 1.0 0 -1264960 true "" ""
"sweets" 1.0 0 -5987164 true "" ""

SWITCH
26
370
172
403
price-change?
price-change?
1
1
-1000

PLOT
673
311
1111
484
Food-Score
time (day)
score
0.0
10.0
0.0
10.0
true
true
"" ""
PENS
"milk" 1.0 0 -13791810 true "" ""
"meat" 1.0 0 -8630108 true "" ""
"grains" 1.0 0 -955883 true "" ""
"fruits" 1.0 0 -2674135 true "" ""
"vegetables" 1.0 0 -10899396 true "" ""

PLOT
1117
286
1397
484
Food-Consumption
food-type
pounds per capita
0.0
10.0
0.0
10.0
true
true
"" ""
PENS
"milk" 1.0 0 -13791810 true "" ""
"meat" 1.0 0 -8630108 true "" ""
"grains" 1.0 0 -955883 true "" ""
"fruits" 1.0 0 -2674135 true "" ""
"vegetables" 1.0 0 -10899396 true "" ""

BUTTON
45
292
108
325
NIL
do8
NIL
1
T
OBSERVER
NIL
NIL
NIL
NIL
1

SWITCH
27
404
163
437
plot-update?
plot-update?
1
1
-1000

CHOOSER
45
207
183
252
Objective
Objective
"diet-%" "hei" "elasticity" "history" "history-z-test"
0

@#$#@#$#@
## WHAT IS IT?

(a general understanding of what the model is trying to show or explain)

## HOW IT WORKS

(what rules the agents use to create the overall behavior of the model)

## HOW TO USE IT

(how to use the model, including a description of each of the items in the Interface tab)

## THINGS TO NOTICE

(suggested things for the user to notice while running the model)

## THINGS TO TRY

(suggested things for the user to try to do (move sliders, switches, etc.) with the model)

## EXTENDING THE MODEL

(suggested things to add or change in the Code tab to make the model more complicated, detailed, accurate, etc.)

## NETLOGO FEATURES

(interesting or unusual features of NetLogo that the model uses, particularly in the Code tab; or where workarounds were needed for missing features)

## RELATED MODELS

(models in the NetLogo Models Library and elsewhere which are of related interest)

## CREDITS AND REFERENCES

(a reference to the model's URL on the web if it has one, as well as any other necessary credits, citations, and links)
@#$#@#$#@
default
true
0
Polygon -7500403 true true 150 5 40 250 150 205 260 250

airplane
true
0
Polygon -7500403 true true 150 0 135 15 120 60 120 105 15 165 15 195 120 180 135 240 105 270 120 285 150 270 180 285 210 270 165 240 180 180 285 195 285 165 180 105 180 60 165 15

arrow
true
0
Polygon -7500403 true true 150 0 0 150 105 150 105 293 195 293 195 150 300 150

box
false
0
Polygon -7500403 true true 150 285 285 225 285 75 150 135
Polygon -7500403 true true 150 135 15 75 150 15 285 75
Polygon -7500403 true true 15 75 15 225 150 285 150 135
Line -16777216 false 150 285 150 135
Line -16777216 false 150 135 15 75
Line -16777216 false 150 135 285 75

bug
true
0
Circle -7500403 true true 96 182 108
Circle -7500403 true true 110 127 80
Circle -7500403 true true 110 75 80
Line -7500403 true 150 100 80 30
Line -7500403 true 150 100 220 30

butterfly
true
0
Polygon -7500403 true true 150 165 209 199 225 225 225 255 195 270 165 255 150 240
Polygon -7500403 true true 150 165 89 198 75 225 75 255 105 270 135 255 150 240
Polygon -7500403 true true 139 148 100 105 55 90 25 90 10 105 10 135 25 180 40 195 85 194 139 163
Polygon -7500403 true true 162 150 200 105 245 90 275 90 290 105 290 135 275 180 260 195 215 195 162 165
Polygon -16777216 true false 150 255 135 225 120 150 135 120 150 105 165 120 180 150 165 225
Circle -16777216 true false 135 90 30
Line -16777216 false 150 105 195 60
Line -16777216 false 150 105 105 60

car
false
0
Polygon -7500403 true true 300 180 279 164 261 144 240 135 226 132 213 106 203 84 185 63 159 50 135 50 75 60 0 150 0 165 0 225 300 225 300 180
Circle -16777216 true false 180 180 90
Circle -16777216 true false 30 180 90
Polygon -16777216 true false 162 80 132 78 134 135 209 135 194 105 189 96 180 89
Circle -7500403 true true 47 195 58
Circle -7500403 true true 195 195 58

circle
false
0
Circle -7500403 true true 0 0 300

circle 2
false
0
Circle -7500403 true true 0 0 300
Circle -16777216 true false 30 30 240

cow
false
0
Polygon -7500403 true true 200 193 197 249 179 249 177 196 166 187 140 189 93 191 78 179 72 211 49 209 48 181 37 149 25 120 25 89 45 72 103 84 179 75 198 76 252 64 272 81 293 103 285 121 255 121 242 118 224 167
Polygon -7500403 true true 73 210 86 251 62 249 48 208
Polygon -7500403 true true 25 114 16 195 9 204 23 213 25 200 39 123

cylinder
false
0
Circle -7500403 true true 0 0 300

dot
false
0
Circle -7500403 true true 90 90 120

face happy
false
0
Circle -7500403 true true 8 8 285
Circle -16777216 true false 60 75 60
Circle -16777216 true false 180 75 60
Polygon -16777216 true false 150 255 90 239 62 213 47 191 67 179 90 203 109 218 150 225 192 218 210 203 227 181 251 194 236 217 212 240

face neutral
false
0
Circle -7500403 true true 8 7 285
Circle -16777216 true false 60 75 60
Circle -16777216 true false 180 75 60
Rectangle -16777216 true false 60 195 240 225

face sad
false
0
Circle -7500403 true true 8 8 285
Circle -16777216 true false 60 75 60
Circle -16777216 true false 180 75 60
Polygon -16777216 true false 150 168 90 184 62 210 47 232 67 244 90 220 109 205 150 198 192 205 210 220 227 242 251 229 236 206 212 183

fish
false
0
Polygon -1 true false 44 131 21 87 15 86 0 120 15 150 0 180 13 214 20 212 45 166
Polygon -1 true false 135 195 119 235 95 218 76 210 46 204 60 165
Polygon -1 true false 75 45 83 77 71 103 86 114 166 78 135 60
Polygon -7500403 true true 30 136 151 77 226 81 280 119 292 146 292 160 287 170 270 195 195 210 151 212 30 166
Circle -16777216 true false 215 106 30

flag
false
0
Rectangle -7500403 true true 60 15 75 300
Polygon -7500403 true true 90 150 270 90 90 30
Line -7500403 true 75 135 90 135
Line -7500403 true 75 45 90 45

flower
false
0
Polygon -10899396 true false 135 120 165 165 180 210 180 240 150 300 165 300 195 240 195 195 165 135
Circle -7500403 true true 85 132 38
Circle -7500403 true true 130 147 38
Circle -7500403 true true 192 85 38
Circle -7500403 true true 85 40 38
Circle -7500403 true true 177 40 38
Circle -7500403 true true 177 132 38
Circle -7500403 true true 70 85 38
Circle -7500403 true true 130 25 38
Circle -7500403 true true 96 51 108
Circle -16777216 true false 113 68 74
Polygon -10899396 true false 189 233 219 188 249 173 279 188 234 218
Polygon -10899396 true false 180 255 150 210 105 210 75 240 135 240

house
false
0
Rectangle -7500403 true true 45 120 255 285
Rectangle -16777216 true false 120 210 180 285
Polygon -7500403 true true 15 120 150 15 285 120
Line -16777216 false 30 120 270 120

leaf
false
0
Polygon -7500403 true true 150 210 135 195 120 210 60 210 30 195 60 180 60 165 15 135 30 120 15 105 40 104 45 90 60 90 90 105 105 120 120 120 105 60 120 60 135 30 150 15 165 30 180 60 195 60 180 120 195 120 210 105 240 90 255 90 263 104 285 105 270 120 285 135 240 165 240 180 270 195 240 210 180 210 165 195
Polygon -7500403 true true 135 195 135 240 120 255 105 255 105 285 135 285 165 240 165 195

line
true
0
Line -7500403 true 150 0 150 300

line half
true
0
Line -7500403 true 150 0 150 150

pentagon
false
0
Polygon -7500403 true true 150 15 15 120 60 285 240 285 285 120

person
false
0
Circle -7500403 true true 110 5 80
Polygon -7500403 true true 105 90 120 195 90 285 105 300 135 300 150 225 165 300 195 300 210 285 180 195 195 90
Rectangle -7500403 true true 127 79 172 94
Polygon -7500403 true true 195 90 240 150 225 180 165 105
Polygon -7500403 true true 105 90 60 150 75 180 135 105

plant
false
0
Rectangle -7500403 true true 135 90 165 300
Polygon -7500403 true true 135 255 90 210 45 195 75 255 135 285
Polygon -7500403 true true 165 255 210 210 255 195 225 255 165 285
Polygon -7500403 true true 135 180 90 135 45 120 75 180 135 210
Polygon -7500403 true true 165 180 165 210 225 180 255 120 210 135
Polygon -7500403 true true 135 105 90 60 45 45 75 105 135 135
Polygon -7500403 true true 165 105 165 135 225 105 255 45 210 60
Polygon -7500403 true true 135 90 120 45 150 15 180 45 165 90

sheep
false
15
Circle -1 true true 203 65 88
Circle -1 true true 70 65 162
Circle -1 true true 150 105 120
Polygon -7500403 true false 218 120 240 165 255 165 278 120
Circle -7500403 true false 214 72 67
Rectangle -1 true true 164 223 179 298
Polygon -1 true true 45 285 30 285 30 240 15 195 45 210
Circle -1 true true 3 83 150
Rectangle -1 true true 65 221 80 296
Polygon -1 true true 195 285 210 285 210 240 240 210 195 210
Polygon -7500403 true false 276 85 285 105 302 99 294 83
Polygon -7500403 true false 219 85 210 105 193 99 201 83

square
false
0
Rectangle -7500403 true true 30 30 270 270

square 2
false
0
Rectangle -7500403 true true 30 30 270 270
Rectangle -16777216 true false 60 60 240 240

star
false
0
Polygon -7500403 true true 151 1 185 108 298 108 207 175 242 282 151 216 59 282 94 175 3 108 116 108

target
false
0
Circle -7500403 true true 0 0 300
Circle -16777216 true false 30 30 240
Circle -7500403 true true 60 60 180
Circle -16777216 true false 90 90 120
Circle -7500403 true true 120 120 60

tree
false
0
Circle -7500403 true true 118 3 94
Rectangle -6459832 true false 120 195 180 300
Circle -7500403 true true 65 21 108
Circle -7500403 true true 116 41 127
Circle -7500403 true true 45 90 120
Circle -7500403 true true 104 74 152

triangle
false
0
Polygon -7500403 true true 150 30 15 255 285 255

triangle 2
false
0
Polygon -7500403 true true 150 30 15 255 285 255
Polygon -16777216 true false 151 99 225 223 75 224

truck
false
0
Rectangle -7500403 true true 4 45 195 187
Polygon -7500403 true true 296 193 296 150 259 134 244 104 208 104 207 194
Rectangle -1 true false 195 60 195 105
Polygon -16777216 true false 238 112 252 141 219 141 218 112
Circle -16777216 true false 234 174 42
Rectangle -7500403 true true 181 185 214 194
Circle -16777216 true false 144 174 42
Circle -16777216 true false 24 174 42
Circle -7500403 false true 24 174 42
Circle -7500403 false true 144 174 42
Circle -7500403 false true 234 174 42

turtle
true
0
Polygon -10899396 true false 215 204 240 233 246 254 228 266 215 252 193 210
Polygon -10899396 true false 195 90 225 75 245 75 260 89 269 108 261 124 240 105 225 105 210 105
Polygon -10899396 true false 105 90 75 75 55 75 40 89 31 108 39 124 60 105 75 105 90 105
Polygon -10899396 true false 132 85 134 64 107 51 108 17 150 2 192 18 192 52 169 65 172 87
Polygon -10899396 true false 85 204 60 233 54 254 72 266 85 252 107 210
Polygon -7500403 true true 119 75 179 75 209 101 224 135 220 225 175 261 128 261 81 224 74 135 88 99

wheel
false
0
Circle -7500403 true true 3 3 294
Circle -16777216 true false 30 30 240
Line -7500403 true 150 285 150 15
Line -7500403 true 15 150 285 150
Circle -7500403 true true 120 120 60
Line -7500403 true 216 40 79 269
Line -7500403 true 40 84 269 221
Line -7500403 true 40 216 269 79
Line -7500403 true 84 40 221 269

wolf
false
0
Polygon -16777216 true false 253 133 245 131 245 133
Polygon -7500403 true true 2 194 13 197 30 191 38 193 38 205 20 226 20 257 27 265 38 266 40 260 31 253 31 230 60 206 68 198 75 209 66 228 65 243 82 261 84 268 100 267 103 261 77 239 79 231 100 207 98 196 119 201 143 202 160 195 166 210 172 213 173 238 167 251 160 248 154 265 169 264 178 247 186 240 198 260 200 271 217 271 219 262 207 258 195 230 192 198 210 184 227 164 242 144 259 145 284 151 277 141 293 140 299 134 297 127 273 119 270 105
Polygon -7500403 true true -1 195 14 180 36 166 40 153 53 140 82 131 134 133 159 126 188 115 227 108 236 102 238 98 268 86 269 92 281 87 269 103 269 113

x
false
0
Polygon -7500403 true true 270 75 225 30 30 225 75 270
Polygon -7500403 true true 30 75 75 30 270 225 225 270

@#$#@#$#@
NetLogo 5.3.1
@#$#@#$#@
@#$#@#$#@
@#$#@#$#@
<experiments>
  <experiment name="hei" repetitions="100" runMetricsEveryStep="false">
    <setup>setup</setup>
    <go>go</go>
    <metric>item 0 food-score-avg</metric>
    <metric>item 1 food-score-avg</metric>
    <metric>item 4 food-score-avg</metric>
    <metric>item 5 food-score-avg</metric>
    <metric>item 6 food-score-avg</metric>
    <enumeratedValueSet variable="Objective">
      <value value="&quot;hei&quot;"/>
    </enumeratedValueSet>
    <enumeratedValueSet variable="Decision-process">
      <value value="&quot;Price-per-Calorie&quot;"/>
      <value value="&quot;Price-per-Gram&quot;"/>
      <value value="&quot;Price-per-Serving&quot;"/>
    </enumeratedValueSet>
  </experiment>
  <experiment name="elasticity" repetitions="100" runMetricsEveryStep="false">
    <setup>setup</setup>
    <go>go</go>
    <metric>item 0 income-elasticity</metric>
    <metric>item 1 income-elasticity</metric>
    <metric>item 2 income-elasticity</metric>
    <metric>item 3 income-elasticity</metric>
    <metric>item 4 income-elasticity</metric>
    <metric>item 5 income-elasticity</metric>
    <metric>item 6 income-elasticity</metric>
    <metric>item 7 income-elasticity</metric>
    <metric>item 8 income-elasticity</metric>
    <enumeratedValueSet variable="Objective">
      <value value="&quot;elasticity&quot;"/>
    </enumeratedValueSet>
    <enumeratedValueSet variable="Decision-process">
      <value value="&quot;Price-per-Calorie&quot;"/>
      <value value="&quot;Price-per-Gram&quot;"/>
      <value value="&quot;Price-per-Serving&quot;"/>
    </enumeratedValueSet>
  </experiment>
  <experiment name="diet-percent" repetitions="100" runMetricsEveryStep="false">
    <setup>setup</setup>
    <go>go</go>
    <metric>item 0 food-share-avg-agr</metric>
    <metric>item 1 food-share-avg-agr</metric>
    <metric>item 2 food-share-avg-agr</metric>
    <metric>item 3 food-share-avg-agr</metric>
    <metric>item 4 food-share-avg-agr</metric>
    <metric>item 5 food-share-avg-agr</metric>
    <metric>item 6 food-share-avg-agr</metric>
    <metric>item 7 food-share-avg-agr</metric>
    <metric>item 8 food-share-avg-agr</metric>
    <enumeratedValueSet variable="Objective">
      <value value="&quot;diet-%&quot;"/>
    </enumeratedValueSet>
    <enumeratedValueSet variable="Decision-process">
      <value value="&quot;Price-per-Calorie&quot;"/>
    </enumeratedValueSet>
  </experiment>
  <experiment name="history-sensetive" repetitions="1000" runMetricsEveryStep="false">
    <setup>setup</setup>
    <go>go</go>
    <metric>item 0 food-share-avg-agr</metric>
    <metric>item 1 food-share-avg-agr</metric>
    <metric>item 2 food-share-avg-agr</metric>
    <metric>item 3 food-share-avg-agr</metric>
    <metric>item 4 food-share-avg-agr</metric>
    <metric>item 5 food-share-avg-agr</metric>
    <metric>item 6 food-share-avg-agr</metric>
    <metric>item 7 food-share-avg-agr</metric>
    <metric>item 8 food-share-avg-agr</metric>
    <enumeratedValueSet variable="Objective">
      <value value="&quot;history&quot;"/>
    </enumeratedValueSet>
    <enumeratedValueSet variable="Decision-process">
      <value value="&quot;Price-per-Calorie&quot;"/>
    </enumeratedValueSet>
  </experiment>
  <experiment name="history-z-test" repetitions="1" runMetricsEveryStep="false">
    <setup>setup</setup>
    <go>go</go>
    <enumeratedValueSet variable="Objective">
      <value value="&quot;history&quot;"/>
    </enumeratedValueSet>
    <enumeratedValueSet variable="Decision-process">
      <value value="&quot;Price-per-Calorie&quot;"/>
    </enumeratedValueSet>
  </experiment>
</experiments>
@#$#@#$#@
@#$#@#$#@
default
0.0
-0.2 0 0.0 1.0
0.0 1 1.0 0.0
0.2 0 0.0 1.0
link direction
true
0
Line -7500403 true 150 150 90 180
Line -7500403 true 150 150 210 180

@#$#@#$#@
0
@#$#@#$#@
